# Supplementary material for: Chromosome territories, X;Y translocation and Premature Ovarian Failure: is there a relationship?
Source: Springer Nature journal article supplement (doi:10.1186/1755-8166-2-19), 2009-09-27
Supplement: Additional file 4 [file 1755-8166-2-19-s4.doc]

**Additional file 4**

**Statistical analysis of chromosome territory (CT) and centromere distribution in interphase nuclei.**

|  | **2 Test, p-value** | | | |
| --- | --- | --- | --- | --- |
| **CT Distance** | | | |
|  | **≤30%** | **30-50%** | **>50%** | **General** |
| **Male vs. Female Controls** | 0.935 | 0.662 | 0.770 | 0.876 |
| **Patient vs. Pooled Controls** | 0.924 | 0.104 | 0.155 | 0.184 |

A. Statistical analysis of chromosome territory (CT) distances (X, Y and derivative Y chromosomes) in interphase nuclei.

|  | **2 Test, p-value** | | | |
| --- | --- | --- | --- | --- |
| **CEP X; CEP Y Distance** | | | |
|  | **≤30%** | **30-50%** | **>50%** | **General** |
| **Patient vs. Male Controls** | 0.309 | 0.872 | 0.224 | 0.318 |

B. Statistical analysis of centromere distribution (X and Y centromeres) in interphase nuclei.
