# Supplementary material for: Chromosome territories, X;Y translocation and Premature Ovarian Failure: is there a relationship?
Source: Springer Nature journal article supplement (doi:10.1186/1755-8166-2-19), 2009-09-27
Supplement: Additional file 6 [file 1755-8166-2-19-s6.doc]

**Additional file 6**

| **Primers** | **Sequence (5’-3’)** |
| --- | --- |
| **Forward** | GAATACATTGTCAGGGTACTAGG |
| **Reverse** | TCGTGTTGACACAACTTGTCTTG |
| **ForwardA** | GAATACATTGTCAGGGTACTAGG |
| **ReverseA** | TTCTGTGCCTCCTGGAAGAATG |
| **ForwardB** | GCGAAACTCAGAGATCAGCAAG |
| **ReverseB** | TCGTGTTGACACAACTTGTCTTG |

**Sequences of forward and reverse primers used in PCR reaction for SRY gene sequencing.** Primer details for SRY sequencing**.**
